# Supplementary material for: Upregulated lncRNA-UCA1 contributes to progression of hepatocellular carcinoma through inhibition of miR-216b and activation of FGFR1/ERK signaling pathway
Source: PubMed Central journal article supplement (PMC4480724; doi:10.18632/oncotarget.3219), 2015-02-11
Supplement: oncotarget-06-7899-s001.pdf [file oncotarget-06-7899-s001.pdf]

SUPPLEMENTARY FIGURES AND TABLE

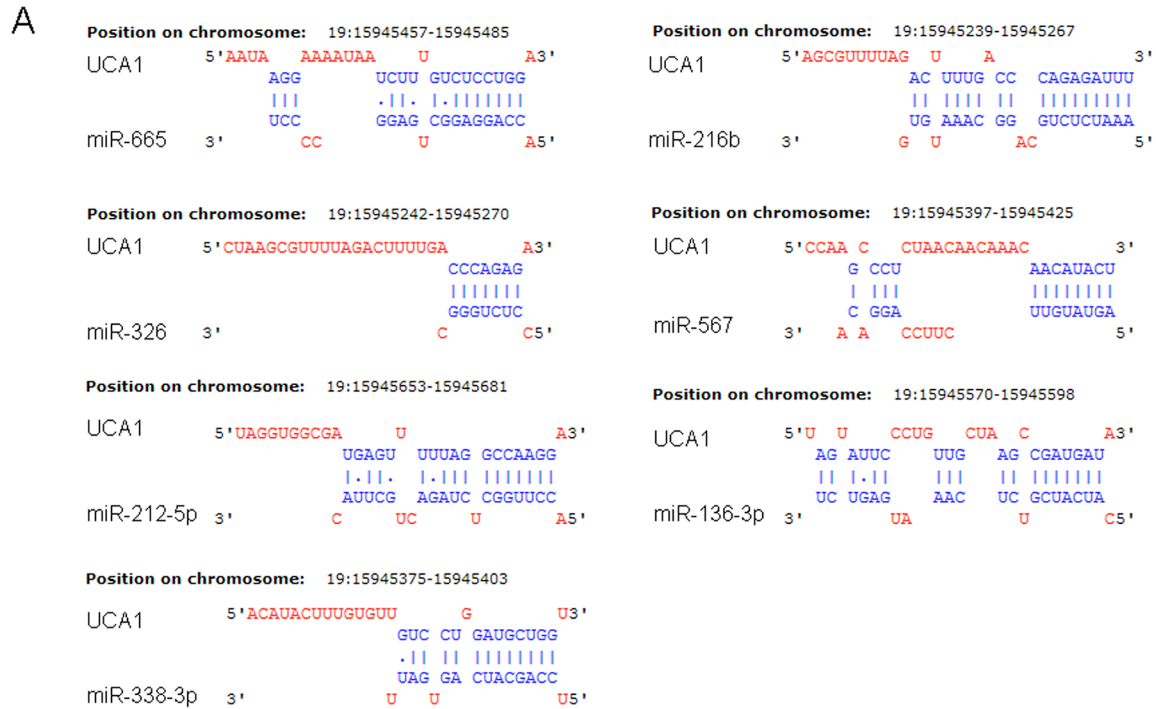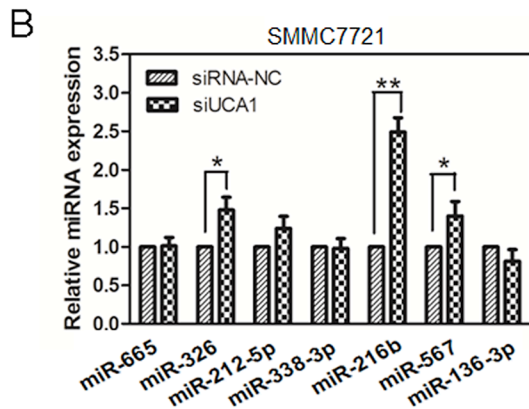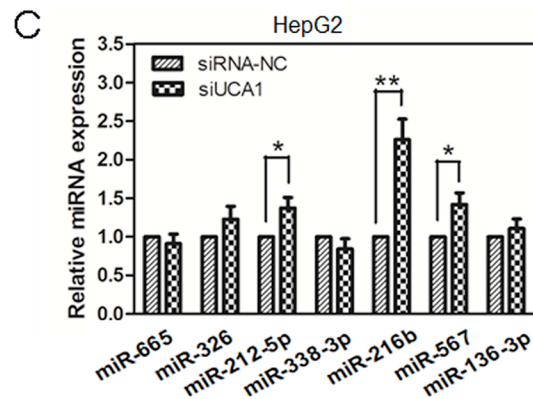

**Supplementary Figure S1: MiRNAs expression in siUCA1 transfected HCC cell lines.** (A) Potential binding sites of seven randomly predicted targeting-miRNAs of UCA1, namely miR-665, miR-326, miR-212-5p, miR-338-3p, miR-216b, miR-567, miR-136-3p, respectively. The expression of miRNAs was detected in siUCA1 transfected SMMC7721 cells (B) and HepG2 cells (C) by qRT-PCR. All experiments were at least repeated in triplicate, mean±SD, \* $P < 0.05$ , \*\* $P < 0.01$ , versus siRNA-NC.

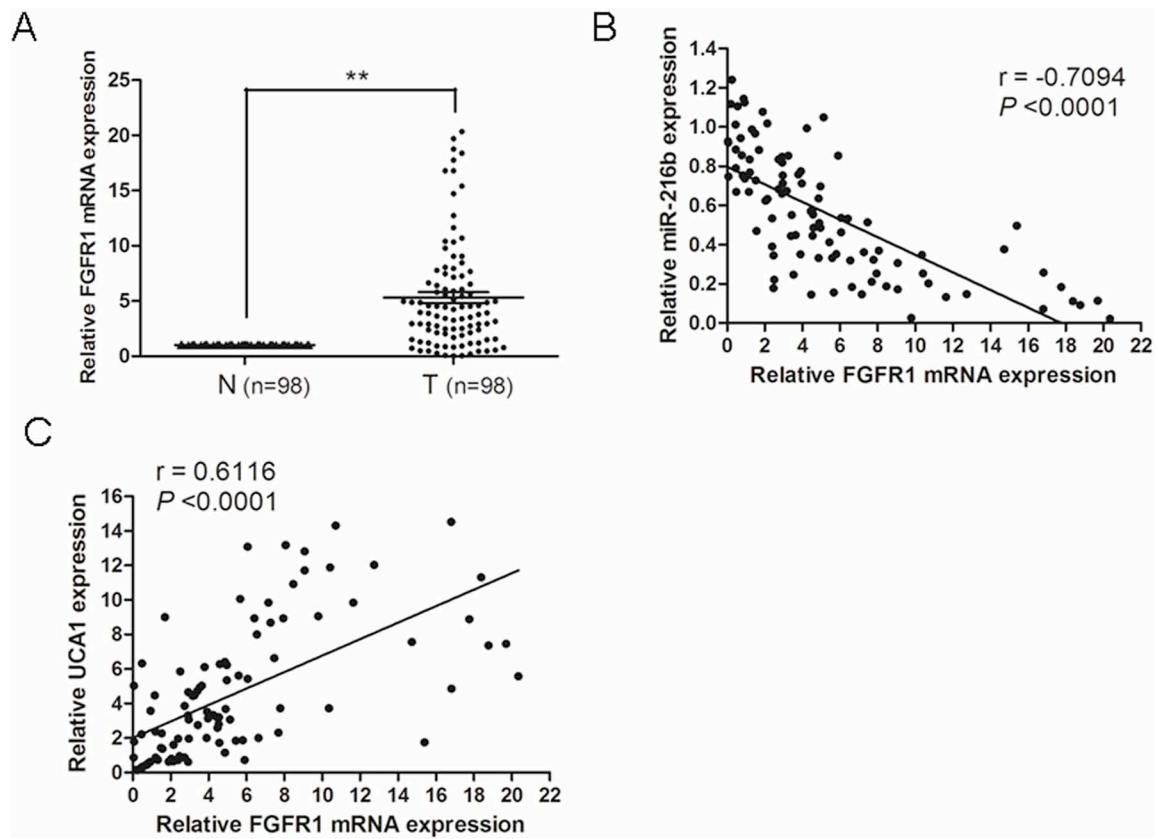

**Supplementary Figure S2: Relative FGFR1 mRNA expression in HCC tissues.** (A) FGFR1 mRNA was examined by qRT-PCR and normalized to GAPDH expression in 98 pairs of HCC tissues (T) compared with corresponding nontumorous liver specimens (N),  $**P < 0.001$ . The correlation analyses were performed between the levels of FGFR1 mRNA expression and the levels of UCA1 expression (B) or miR-216b expression (C) in HCC tissues ( $n = 98$ ).

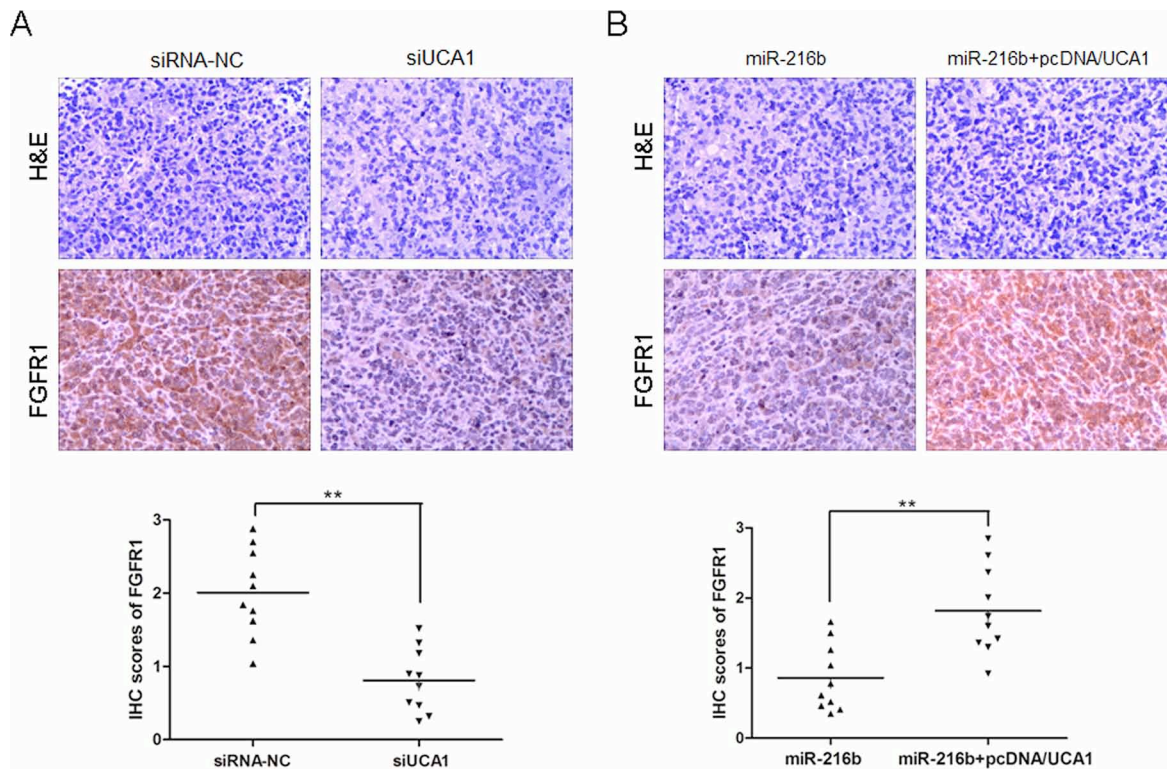

**Supplementary Figure S3: Immunohistochemical staining for FGFR1 in tumor tissues from nude mice models.** (A) Representative tumor tissues developed from siRNA-NC or siUCA1 transfected SMMC7721 cells. (B) Representative tumor tissues developed from miR-216b or miR-216b + pcDNA/UCA1 transfected SMMC7721 cells. Upper: H&E staining; Lower: immunostaining ( $\times 200$ ). Quantification assays were represented as immunohistochemistry (IHC) scores of FGFR1 from 10 arbitrarily selected fields,  $**P < 0.01$ .

### Supplementary Table S1: Primers and siRNA sequences used in this study

| Primers for qRT-PCR |                      |
|---------------------|----------------------|
| Primer name         | 5'-3'                |
| miR-216b-F          | CAGGCACACACTTACCCGTA |
| miR-216b-R          | GCAGGGTCCGAGGTATTC   |
| miR-665-F           | ACGCCAACCAGGAGGCTGAG |
| miR-665-R           | GCAGGGTCCGAGGTATTC   |
| miR-326-F           | ATTGAACCTCTGGGCCCTTC |
| miR-326-R           | GCAGGGTCCGAGGTATTC   |
| miR-212-5p-F        | ATCGCCACCTTGGCTCTAGA |
| miR-212-5p-R        | GCAGGGTCCGAGGTATTC   |
| miR-338-3p-F        | ATTGAAGGAGTCGCCTGAGT |
| miR-338-3p-R        | GCAGGGTCCGAGGTATTC   |
| miR-567-F           | ACGCCAAGTATGTTCTTCCA |
| miR-567-R           | GCAGGGTCCGAGGTATTC   |

(Continued)

## Primers for qRT-PCR

| Primer name                                     | 5'-3'                                                                |
|-------------------------------------------------|----------------------------------------------------------------------|
| miR-136-3p-F                                    | ATCGCCCATCATCGTCTCAA                                                 |
| miR-136-3p-R                                    | GCAGGGTCCGAGGTATTC                                                   |
| U6-F                                            | CTCGCTTCGGCAGCACA                                                    |
| U6-R                                            | AACGCTTCACGAATTTGCGT                                                 |
| GAPDH-F                                         | GGTGGTCTCCTCTGACTTCAA                                                |
| GAPDH-R                                         | GTTGCTGTAGCCAAATTCGTTGT                                              |
| FGFR1-F                                         | AACCTGACCACAGAATTGGAGGCT                                             |
| FGFR1-R                                         | ATGCTGCCGTACTCATTCTCCACA                                             |
| UCA1-F                                          | CTCTCCTATCTCCCTTCACTGA                                               |
| UCA1-R                                          | CTTTGGGTTGAGGTTCTCTGT                                                |
| Primers for subcloning and plasmid construction |                                                                      |
| Primer name                                     | 5'-3'                                                                |
| pCDNA/UCA1-F                                    | GGATCCGATCTCTCCTCTTCCTCCTG                                           |
| pCDNA/UCA1-R                                    | CTCGAGAGGAAGATTTCTTTTCTGTC                                           |
| pCDNA/pre-miR-216b-F                            | GGATCCTCCTTCATTCTCTATGGA                                             |
| pCDNA/pre-miR-216b-R                            | CTCGAGGTTACAAACAACCTTCTT                                             |
| pMIR-UCA1-F                                     | ACGCGTGATCTCTCCTCTTCCTCCTG                                           |
| pMIR-UCA1-R                                     | AAGCTTAGGAAGATTTCTTTTCTGTC                                           |
| pMIR-FGFR1/3'-UTR-F                             | CAGTCGACAATCACTCCTGGGAAGATCTCATTG                                    |
| pMIR-FGFR1/3'-UTR-R                             | GGTGGATCCAGGGCCACAAGGTGGACAATCGG                                     |
| siRNA Oligos                                    |                                                                      |
| name                                            | 5'-3'                                                                |
| siUCA1-sense                                    | GATCCGGCTAATATGCCTGATTACTTTCAAGAG<br>AAGTAATCAGGCATATTAGCTTTTTTGGAAA |
| siUCA1-antisense                                | AGCTTTTCCAAAAAAGCTAATATGCCTGATTAC<br>TTCTCTTGAAAGTAATCAGGCATATTAGCCG |
| siRNA-NC-sense                                  | GATCCGGCCTGTTTAGGTGGTCTTTTCAAGAGA<br>AAGACCACCTAAACAGGCTTTTTTGGAAA   |
| siRNA-NC-antisense                              | AGCTTTTCCAAAAAAGCCTGTTTAGGTGGTCTT<br>TCTCTTGAAAAGACCACCTAAACAGGCCG   |
